# Supplementary material for: Alternative Processing as Evolutionary Mechanism for the Origin of Novel Nonprotein Coding RNAs
Source: PubMed Central journal article supplement — Genome Biol Evol. 2013 Oct 15;5(11):2061–71. doi: 10.1093/gbe/evt155 (PMC3845636; doi:10.1093/gbe/evt155), 2013-10-15
Supplement: supp_evt155_Mo_et_al_Supp_Fig_1.pdf [file supp_evt155_Mo_et_al_Supp_Fig_1.pdf]

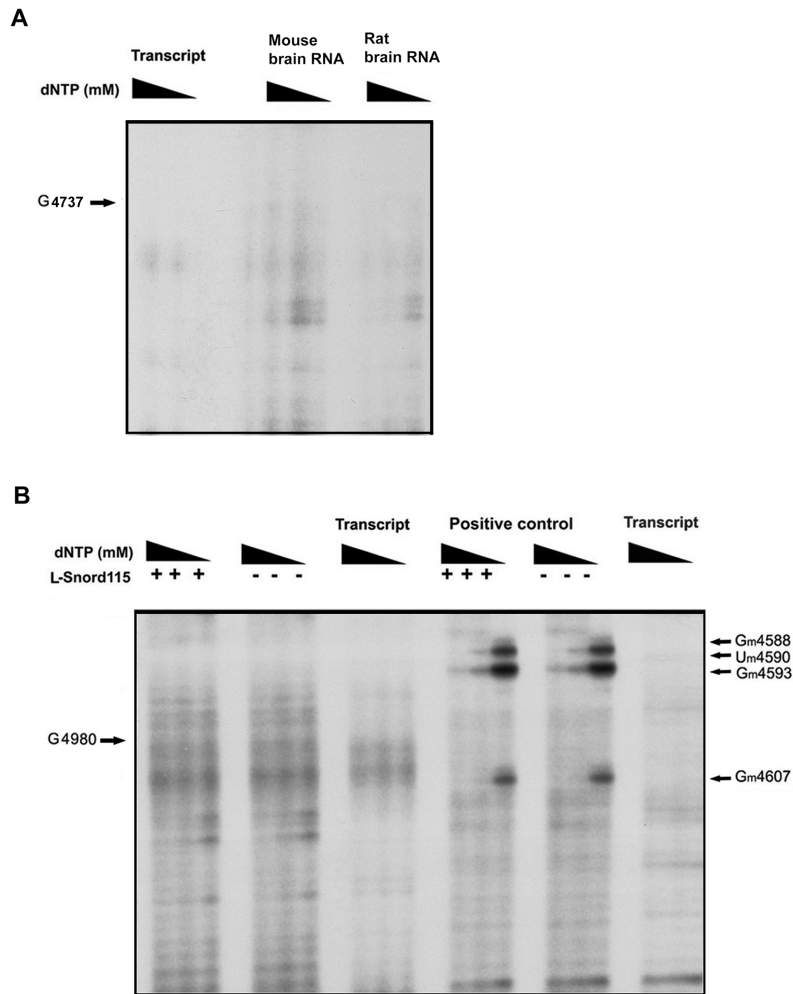

**Supplementary Fig. 1. Experimental analysis of 2'-O-methylation in 28S rRNA molecules.**

**A.** Experimental analysis of the predicted 2'-O-methylation in the 28S rRNAs of rat and mouse brain. **B.** Experimental query of 2'-O-methylation at the predicted position in the presence (+) or absence (-) of guide L-Snord115 RNA in the HeLa cells. As positive control, known 2'-O-methylated nucleotides of 28S rRNA (denoted on the right of the gel) were mapped. **A and B.** Decreasing concentrations of dNTPs during reverse transcription are indicated. As additional control, *in vitro* transcripts (designated as Transcript) of the investigated regions from 28S rRNAs were reverse transcribed.
